# Supplementary material for: Research on agricultural grey water footprint/efficiency and identification of influencing factors in Henan Province
Source: Royal Society of Chemistry journal article supplement (doi:10.1039/d4em00675e), 2025-01-01
Supplement: d4em00675e1.xlsx [file d4em00675e1.xlsx]

## Sheet: Sheet1
Arable Land Area by City (1 000 hectares)	耕地面积（千公顷）	2001	2002	2003	2004	2005	2006	2007	2008	2009	2010	2011	2012	2013	2014	2015	2016	2017	2018	2019	2020	2021
Zhengzhou	郑 州 市	289.91	299.56	296.46	296.46	330.14	330.7	329.8	328.529	340.51	337.64	333.8	331.79	328.68	325.06	319.18	315.75	314.924	314.141	313.329	312.536	311.73
Kaifeng	开 封 市	363.4	397	394.21	394.21	428.29	427.9	427.9	427.849	417.57	417.3	416.53	416.17	414.37	414.3	413.98	416.3	416.031	418.038	418.507	419.992	420.796
Luoyang	洛 阳 市	382.54	369.05	360.18	360.18	426.95	425.1	424.8	424.278	435.09	434.07	433.14	432.6	432.61	432.08	430.93	430.79	433.861	434.443	434.647	435.08	435.342
Pingdingshan	平顶山市	302.08	313.49	312.92	312.92	315.42	315.4	315.4	315.367	323.66	322	321.63	321.8	321.75	320.16	319.51	320.38	320.114	322.471	321.561	323.159	323.32
Anyang	安 阳 市	366.69	398.7	395.16	395.16	408.92	408.4	408.5	408.457	411.38	410.15	409.74	410.02	409.87	409.13	407.77	407.15	407.119	408.739	408.079	409.197	409.319
Hebi	鹤 壁 市	98.93	98.95	96.08	96.08	105.18	105.3	105.4	105.202	124.42	123.38	122.51	121.79	120.62	119.64	119.67	119.6	119.25	119.672	119.571	119.822	119.83
Xinxiang	新 乡 市	374.73	396.31	387.68	387.68	454.32	454.1	454.1	454.002	475.36	475.22	474.87	475.51	475.41	474.56	473.1	472.81	472.186	475.658	473.948	476.378	476.648
Jiaozuo	焦 作 市	175.62	183.45	181.55	181.55	192.79	192.5	192.5	192.518	195.6	196.45	195.25	195.64	195.34	195.18	194.89	195.16	195.753	196.692	196.008	196.812	196.957
Puyang	濮 阳 市	246.25	247.33	248.76	248.76	268.89	269.3	269.8	269.919	282.49	282.67	283.16	283.63	283.28	282.85	282.7	282.83	281.1	281.219	281.584	281.294	281.175
Xuchang	许 昌 市	305.08	326.4	325.5	325.5	343.92	343.9	344	343.964	344.98	343.49	340.95	339.49	338.84	337.42	335.85	335.99	336.224	337.888	336.778	336.962	337.661
Luohe	漯 河 市	165.44	166.48	166.42	166.42	189.22	188.6	188.6	188.648	190.68	191.14	190.66	190.53	190.16	189.63	188.82	190.01	190.089	190.238	190.12	190.149	190.215
Sanmenxia	三门峡市	154.04	171.91	158.97	158.97	177.98	178	177.9	179.127	177.56	177	176.53	176.98	176.9	176.66	176.16	175.93	175.566	179.722	177.225	177.502	179.176
Nanyang	南 阳 市	891.94	951.5	940.66	940.66	992.77	994.3	994.2	994.857	1059.9	1057.2	1055.94	1056.91	1054.45	1053.36	1051.69	1052.18	1052.19	1055.84	1053.54	1053.86	1055.34
Shangqiu	商 丘 市	623.92	668.33	666.39	666.39	719.86	720	720	719.977	709.04	708.39	708.73	708.35	706.94	705.78	704	707.81	707.741	716.297	710.94	711.654	715.143
Xinyang	信 阳 市	516.41	585.06	570.62	570.62	790.74	791.3	791.3	791.628	839.75	838.56	839.09	839.75	839.39	840.54	841.78	840.95	841.671	850.165	844.599	845.473	848.988
Zhoukou	周 口 市	783.66	826.01	826.14	826.14	854.12	854.1	854.2	854.172	862.12	860.72	859.31	857.77	856.19	854.78	853.06	856.13	857.343	858.86	857.527	857.909	858.608
Zhumadian	驻马店 市	833.32	828.32	826.36	826.36	885.13	886.1	886.1	886.308	954.75	955.08	953.3	951.59	949.85	948.95	947.08	945.51	945.395	952.163	947.899	948.481	951.21
Jiyuan	济 源 市	33.34	34.91	34.88	34.88	41.7	41.6	41.6	41.5714	47.16	46.99	46.77	46.45	46.07	45.98	45.78	45.73	45.717	46.0515	45.8431	45.8703	46.0047
Source: "Total sown areas of farm crop" section in 《Henan Statistical Yearbook》: https://tjj.henan.gov.cn/tjfw/tjcbw/tjnj/																				Obtained through trend interpolation method
Nitrogen fertilizer (Ton)	氮肥	2001	2002	2003	2004	2005	2006	2007	2008	2009	2010	2011	2012	2013	2014	2015	2016	2017	2018	2019	2020	2021
Zhengzhou	郑 州 市	88333	87985	84075	84434	82537	83722	82684	80652.3	81067	80560	77405	77404	75698	75304	66672	62988	59895	55222	49925	45823	42469.9
Kaifeng	开 封 市	99786	97997	103165	102132	102891	113337	113337	118798	120982	126205	126124	125317	127922	127398	125932	127332	126025	109506	112230	109987	109177
Luoyang	洛 阳 市	90589	80027	82898	82883	81203	84320	83297	82905	86162	89854	87405	87280	83982	82197	80358	72152	66590	65845	65879	63525	62051
Pingdingshan	平顶山市	108156	110890	105631	116147	114553	138768	129201	128700	116538	117859	115883	115355	114309	112869	108845	100279	97105	90171	91386	90232	84734.1
Anyang	安 阳 市	123396	124978	127778	132125	130863	149839	155908	166196	170843	168457	173202	172026	140316	147255	148878	136940	150371	136435	120868	111078	107743
Hebi	鹤 壁 市	31788	31486	29982	29853	29008	29265	28617	24808	30399	29614	30580	31208	32227	31412	33963	32858	32499	24292	24382	22147	21662.6
Xinxiang	新 乡 市	147379	143560	149839	155057	194503	205454	216969	207842	204708	207129	204258	203997	202189	203211	99296	193690	183295	172673	159870	155809	113096
Jiaozuo	焦 作 市	78746	91276	86863	84563	81882	87433	83283	76618	78052	72448	71402	66295	68184	68308	67412	66512	62400	55260	50208	46223	43926
Puyang	濮 阳 市	103290	112168	109960	110346	115191	112027	117367	118300	119313	124224	122315	122136	125108	125202	119501	114534	106088	98320	86864	87640	79336
Xuchang	许 昌 市	82825	84041	77268	72477	68183	78192	79861	90433	92634	90117	92861	89254	94856	87701	82086	76556	62884	55413	50634	49878	49496.1
Luohe	漯 河 市	54249	56428	55896	58779	68188	68250	66024	56863	67306	74543	64777	62566	62337	54702	48362	43728	39449	36029	34225	32241	31524.6
Sanmenxia	三门峡市	30575	28289	26274	25298	25569	26978	27395	26435	27201	27262	28115	29260	28193	27543	27710	27203	26655	24060	22264	20786	19594.1
Nanyang	南 阳 市	216130	236668	247480	253624	264887	283064	290686	277765	275710	287574	306265	299874	296293	294672	286869	279081	264453	246208	228061	218519	212311
Shangqiu	商 丘 市	179651	205208	175866	176513	181043	188719	184540	197640	227241	234234	241521	251839	257811	262865	270361	242625	232759	201515	176299	137616	132877
Xinyang	信 阳 市	166730	181986	188353	196495	200985	198585	235501	234720	248947	260671	279525	290373	292526	270541	279735	263467	258448	208222	205267	209418	200299
Zhoukou	周 口 市	284918	295289	280893	324502	330346	328634	320282	337684	290235	297650	278420	278266	282370	288736	286679	280631	272210	276330	270073	271664	269290
Zhumadian	驻马店 市	214394	227106	216283	198055	190300	167146	164376	160192	147531	141709	143627	143157	142144	146337	146057	151534	150489	153025	143909	142225	139454
Jiyuan	济 源 市	9905	9775	9580	9753	9612	10179	10334	8588	8978	9053	9110	9432	8634	8252	7855	8485	8202	8158	7876	7608	7330.3
Phosphate fertilizer (Ton)	磷肥	2001	2002	2003	2004	2005	2006	2007	2008	2009	2010	2011	2012	2013	2014	2015	2016	2017	2018	2019	2020	2021
Zhengzhou	郑 州 市	43846	44740	43208	43148	42597	43337	44994	43401.2	42828	42614	43133	42790	41678	41100	35677	34102	32473	29645	26651	24241	22058.2
Kaifeng	开 封 市	49848	49415	48220	47438	47544	50621	50621	54172	56061	59010	59250	61567	62828	60256	60219	63665	61791	56069	57702	57194	56654.6
Luoyang	洛 阳 市	40464	38169	38869	39603	38102	40788	40203	39720	38094	41119	40811	40018	38619	36396	37483	35208	32601	31956	31624	30099	29413.1
Pingdingshan	平顶山市	48248	51261	55354	57662	56491	76179	59649	59400	55637	57731	55474	54725	51057	48975	48577	44258	39027	36343	34062	32748	28304.5
Anyang	安 阳 市	54250	56885	48053	50727	49285	61617	50666	66655	64594	66736	76426	68710	69637	70474	65415	58098	49895	41343	40729	38514	36746.6
Hebi	鹤 壁 市	11290	11446	12065	11988	11874	11829	11299	8600	12259	12153	11873	12328	13082	12519	13205	13393	13071	10708	9988	9568	9120.2
Xinxiang	新 乡 市	67495	64144	65939	66834	79583	81985	85873	88327	86290	86031	83856	83871	82872	82739	80225	76429	69344	67688	61511	58208	42482.8
Jiaozuo	焦 作 市	30212	35836	34465	31360	31314	31871	30762	27872	27808	27604	27200	26114	27052	27127	25781	25113	23146	22396	20786	20509	18775.3
Puyang	濮 阳 市	54598	63191	59932	58682	62466	58488	61065	59876	59217	51976	52822	52353	55248	54602	53486	51536	47979	42460	36689	34619	30812.7
Xuchang	许 昌 市	30654	29788	29802	31008	31695	32350	37466	44770	45734	44069	45850	45006	44242	41444	37476	35161	29658	25615	23663	22944	22305
Luohe	漯 河 市	20781	19590	19155	22042	24562	23580	20715	17948	22864	24791	23500	22719	21190	21620	18318	16245	14657	12751	11660	11187	10829.1
Sanmenxia	三门峡市	16170	15008	12795	11968	12295	12257	12593	11809	11631	11409	12314	12233	12250	12252	12137	11661	11455	10326	9750	8979	8441.5
Nanyang	南 阳 市	149936	156852	150760	150715	160401	162720	160997	152551	159436	157258	160502	168601	166319	165954	161525	159882	144559	135194	124758	121073	119128
Shangqiu	商 丘 市	85146	101536	83516	86682	91765	96423	96508	111239	136533	141237	146490	153210	157128	156999	160753	149698	157117	125603	108989	90277	88112.6
Xinyang	信 阳 市	74028	80006	84567	84490	87910	87123	91309	92745	103218	106235	112796	113662	114848	112370	115355	113233	111582	86099	79221	80079	70601.1
Zhoukou	周 口 市	152949	155386	163259	130980	130151	131261	139876	130611	138471	142670	150383	149801	143329	150040	148809	147525	141586	138600	133861	131133	131224
Zhumadian	驻马店 市	80793	83608	82859	94073	98624	99673	98439	99253	99818	101436	101286	103711	104789	97647	96053	96087	95571	85677	80470	78877	79230.9
Jiyuan	济 源 市	5496	5346	5116	4759	4567	4901	4988	4822	5205	5346	5408	5560	5277	5186	4874	5488	5307	5004	4816	4832	4626.49
Chemical fertilizer pure quantity (Ton)	化肥折纯量（吨）	2001	2002	2003	2004	2005	2006	2007	2008	2009	2010	2011	2012	2013	2014	2015	2016	2017	2018	2019	2020	2021
Zhengzhou	郑 州 市	207389	209979	207943	214501	215475	220416	227485	224331	225036	227211	236009	240550	234324	233047	220678	219804	207703	196714	187830	179886	169573
Kaifeng	开 封 市	211459	214531	211955	216900	227850	251678	251678	265171	271540	286853	291562	295462	303388	306698	310089	319153	315821	313774	321938	317695	315433
Luoyang	洛 阳 市	185181	174458	180386	184221	188301	201341	209113	215429	222730	235508	241800	240718	239057	234487	236225	246807	236280	240735	233351	228207	224369
Pingdingshan	平顶山市	212879	225489	236302	266955	268530	284310	306084	323400	327709	350401	354505	357807	372962	384193	384425	383489	375478	360649	341057	337530	324591
Anyang	安 阳 市	241079	251539	248819	262294	271943	323568	337037	382494	391893	422652	433337	437947	455768	479734	481913	463715	446974	442912	432097	401205	391964
Hebi	鹤 壁 市	53057	52605	54350	56905	56105	56965	58164	60600	69566	74675	76104	77297	80238	78513	80812	81109	79986	73248	73996	69650	66924
Xinxiang	新 乡 市	269915	270042	284551	296671	371886	403232	436962	456093	476193	490477	499880	511717	522806	529024	546970	554912	549825	536095	519743	511282	419713
Jiaozuo	焦 作 市	160456	183769	175237	182067	181751	191595	207989	213883	208507	202394	202862	198312	202053	202440	215799	202039	196141	199917	194741	189129	183921
Puyang	濮 阳 市	193256	214318	211535	217378	232593	227807	251670	256958	258800	258880	261232	263537	276262	277063	275730	268001	275678	308032	291586	284178	267680
Xuchang	许 昌 市	184814	187525	189282	191210	194235	198861	201704	293259	306444	310076	321370	309194	297878	293887	291096	290763	250928	227419	202923	200265	197240
Luohe	漯 河 市	107035	108021	109088	118237	137363	138674	139141	138520	155618	170604	167938	167837	173606	174331	171263	175460	176378	174142	172830	172113	168066
Sanmenxia	三门峡市	80620	78253	75915	79557	81671	86314	90156	89689	91331	92214	96704	98627	99114	98945	99174	97778	96571	88832	86279	82244	78288
Nanyang	南 阳 市	557167	603870	635021	670464	704943	736157	759741	753472	766494	798804	843025	871799	871158	870906	912580	902349	846766	807350	762346	743413	722971
Shangqiu	商 丘 市	369282	440576	399336	424772	455826	481216	500988	574682	662000	701855	739105	771078	794470	812671	826907	829876	913410	852538	778648	697871	683625
Xinyang	信 阳 市	276191	308057	319909	334441	348293	349563	409891	419081	450689	472679	515661	528651	542801	521307	539983	518112	512980	451925	448822	452183	436171
Zhoukou	周 口 市	568499	598131	577024	611932	621880	628786	661173	684013	712468	741390	729574	733418	752450	800880	798424	820020	815072	873718	860678	863564	861979
Zhumadian	驻马店 市	517567	546099	541081	581822	600740	600936	624433	644720	667341	691441	702646	715968	721331	735003	743706	749208	746811	755158	733984	725374	710747
Jiyuan	济 源 市	21420	21086	21146	21253	21983	22889	23346	20969	22388	23406	23721	24409	23997	24368	25107	24844	24208	24770	24366	24042	23344
The data for the three indicators above are all sourced from: "Consumption of agricultural materials by city" section in 《Henan Statistical Yearbook》: https://tjj.henan.gov.cn/tjfw/tjcbw/tjnj/
Hogs (year-end) (10 000 heads)	猪年底头数(万头)	2001	2002	2003	2004	2005	2006	2007	2008	2009	2010	2011	2012	2013	2014	2015	2016	2017	2018	2019	2020	2021
Zhengzhou	郑 州 市	158.32	163.51	166.44	179.99	172.22	183.63	146.63	156.7	157.8	158.431	169.7	179.4	177	180.17	167.66	146.52	125.116	82.4671	47.53	71.86	65.7292
Kaifeng	开 封 市	237.92	250.7	288.28	320.44	305.41	336.92	290	324	325.5	326.802	330.61	336.59	321.7	302.87	280.23	267.72	296.967	292.549	203.52	253.23	292.59
Luoyang	洛 阳 市	175.56	179.44	194.77	207.16	198	211.47	178.81	190.8	192.32	193.089	203	208.72	205	192.28	177.54	168.74	140.553	134.03	108.08	119.69	148.399
Pingdingshan	平顶山市	216.07	231.95	246.62	260.02	247.13	292.07	236.88	258.63	260	261.04	270.55	283.31	270.12	271.53	252.6	245.08	244.121	217.983	171.22	210.53	250.573
Anyang	安 阳 市	145.7	153.92	154.27	163	155.21	190.22	163.57	173	174.7	175.399	189	192.83	193	178.54	161.95	164.48	173.758	174.361	102.37	143.25	178.7
Hebi	鹤 壁 市	63.43	69.91	72.13	77.64	74	80.46	67.65	73	73.73	74.0249	81.09	86.55	87	92.28	85.11	88.28	95.7147	91.1953	61.69	86.04	80.4358
Xinxiang	新 乡 市	187.43	206.03	227.19	242.47	229.49	279.47	230.05	245.5	246.7	247.687	260.07	275.49	276.67	273.84	258.35	249.82	286.113	272.897	127.01	233.96	228.823
Jiaozuo	焦 作 市	133.26	144.19	152.4	162.3	153.67	162.84	134.03	145	145.5	146.082	148.65	153.01	151	143.55	136.09	129.71	113.914	113.243	49.72	83.22	77.2106
Puyang	濮 阳 市	127.81	136.24	150.58	160.17	151.65	158.81	126.95	135.2	136	136.544	138.12	146.08	147.5	142	133.01	129.13	97.81	106.257	81.11	94.94	118.093
Xuchang	许 昌 市	227.31	248.69	264.95	285.15	272.29	290.19	235	250.04	252	253.008	260.24	270.44	263	258.63	245.1	232.42	260.024	254.784	167.89	215.76	209.452
Luohe	漯 河 市	158.5	174.56	190.45	205.28	197.5	203.85	173.64	195.77	197.7	198.491	210.42	224.11	225.2	220.22	210.45	216.83	201.417	203.456	154.08	172.65	196.41
Sanmenxia	三门峡市	58.37	60.98	65.76	68.2	65.37	69.51	59.6	64	64.46	64.7178	70.22	75.47	77	75.88	72.4	74.3	73.208	81.884	71.46	78.83	75.9347
Nanyang	南 阳 市	517.5	559.93	610.32	665.48	630.68	699.59	498.22	528.1	533	535.132	544.93	558.42	532	501.04	464.59	452.84	506.988	506.152	436.72	489.54	608.745
Shangqiu	商 丘 市	410.84	422.97	422.61	394.7	373.7	393.5	312.74	331.8	333	334.332	335.64	347.5	333.57	332.22	309.03	325.12	273.136	291.9	248.88	270.3	316.744
Xinyang	信 阳 市	305.97	313.66	323.44	336.25	318.36	333.04	271.66	291.5	292	293.168	299.78	314.6	310.4	313.83	299.22	297.95	288.913	297.861	209.07	235.23	265.32
Zhoukou	周 口 市	442.15	465.58	519.14	527.97	502.73	535.91	436.93	470.6	473	474.892	483.87	507.53	510	519.5	483.6	469.64	521.211	528.805	446.02	493.39	549.902
Zhumadian	驻马店 市	525.86	559.86	618.39	700.26	665.53	727	590	635.3	638.4	640.954	660.74	682.72	653.89	641.42	595.58	581.88	655.036	651.048	470.74	606.56	700.294
Jiyuan	济 源 市	22.5	23.8	25.85	28.66	27.47	41.9	36.63	40.87	41.4	41.5656	42.65	44.9	44.9	46.96	43.52	44.94	35.9973	36.3761	17.96	28	28.9318
Cattles (year-end) (10 000 heads)	牛(万头)	2001	2002	2003	2004	2005	2006	2007	2008	2009	2010	2011	2012	2013	2014	2015	2016	2017	2018	2019	2020	2021
Zhengzhou	郑 州 市	31.24	31.84	33.77	35.28	35.55	36.06	24.73	27.19	28.49	27.6353	26.12	24.5	24.54	23.2	21.49	12.94	7.99429	5.2143	4.12	4.86	5.48566
Kaifeng	开 封 市	51.8	53.45	53.7	60.02	61.18	71.55	54.29	58.31	60.71	58.8887	55.7	53.1	53.47	53.18	53.48	47.82	24.1547	26.9215	31.57	34.35	33.0468
Luoyang	洛 阳 市	75.65	81.79	87.34	92.67	94.25	97.39	66.23	68.27	70.57	68.6529	65.8	62.4	62.5	63.3	64.87	48.2	27.9403	26.6085	27.45	29.49	30.2818
Pingdingshan	平顶山市	72.21	75.93	78.12	79.7	104.02	106.73	80.35	84.06	78.4932	76.5384	73.3	70.1	69.41	53.32	44.78	25.9	19.1543	17.9986	16.04	18.89	20.0806
Anyang	安 阳 市	22.48	23.31	25.15	25.27	27.81	27.66	24.11	28.73	30.73	29.9081	28.3	26.92	27.62	23.81	11.91	8.25	5.71487	4.9216	4.42	4.94	5.29159
Hebi	鹤 壁 市	3.07	2.96	2.83	3.43	3.88	4.72	4.45	5.08	4.9827	4.83322	4.57	4.34	4.45	4.48	3.65	3.07	2.10198	2.056	1.86	2.05	2.03426
Xinxiang	新 乡 市	29.59	35.92	43.29	41.24	48.25	55.25	44.98	47.73	49.73	48.4381	46.2	44.1	44.27	44.22	40.99	21.12	12.4063	14.259	16.38	17.79	17.6708
Jiaozuo	焦 作 市	20.98	30.98	33.91	32.6	29.58	31.46	25.87	25.14	27.1	26.287	24.9	23.77	24.74	19.45	12.45	8.42	9.92695	6.7262	6.23	7.16	8.4292
Puyang	濮 阳 市	17.9	18.97	21.03	22.35	26.27	27.21	22.74	25.65	27.35	26.5295	24.7	23.5	24.81	24.86	25.62	12.16	10.97	5.6655	4.23	4.63	5.24445
Xuchang	许 昌 市	61.56	64.47	66.81	71.73	65.5	63.69	49.09	53.06	54.06	52.7382	49.5	47	45.66	36.57	26.56	12.03	12.5151	9.4079	8.96	9.71	10.13
Luohe	漯 河 市	16.59	15.65	16.28	16.45	15.67	15.88	13.03	14.22	14.3764	13.9451	13.2	12.5	13.02	12.12	13.34	7.71	4.17839	3.0632	2.83	3.05	3.3972
Sanmenxia	三门峡市	39.92	42.27	43.37	46.03	49.39	51.23	40.72	41.46	42.46	41.3862	39.2	37	38.86	32.65	30.38	24.67	13.8782	14.6443	16.58	17.89	18.0326
Nanyang	南 阳 市	279.3	289.45	300.45	316.96	340.36	356.45	160.83	160.05	161.285	156.447	148.2	140.1	135.3	129.71	130.4	113.97	78.6286	75.2902	75.92	81.36	78.9042
Shangqiu	商 丘 市	126.94	132.13	124.82	117.49	120.97	121.52	90.25	94.53	98.53	95.5741	90.3	87	87.45	77.33	67.42	39.65	33.5564	36.9822	33.68	37.31	38.4158
Xinyang	信 阳 市	90.68	88.35	88.84	90.31	90.61	88.33	73	70.3	65	63.2527	58.7	55.5	54.37	56.02	52.89	15.73	13.6641	12.6948	12.72	14.36	15.1458
Zhoukou	周 口 市	162.49	153.26	154.1	147.94	148.68	137.66	103.97	92.75	78.9359	76.5678	72.3	68.3	68.76	68.18	61.71	34.8	26.0151	26.3893	26.48	28.79	29.1804
Zhumadian	驻马店 市	178.41	185.76	188.98	191	196.93	200.25	148.65	150.73	143.299	139	131	124.9	123.46	116.15	107.82	85.55	67.4044	67.6124	66.39	72.18	76.1705
Jiyuan	济 源 市	7.64	7.89	7.82	8.17	7.65	5.9	3.44	3.79	3.807	3.69279	3.5	3.22	3.23	3.26	2.71	2.48	2.46211	2.543	2.63	2.88	3.35521
Sheep and Goats (year-end) (10 000 heads)	羊年底只数(万只)	2001	2002	2003	2004	2005	2006	2007	2008	2009	2010	2011	2012	2013	2014	2015	2016	2017	2018	2019	2020	2021
Zhengzhou	郑 州 市	85.01	88.16	100.21	104.83	104.9	102.82	46.83	53.79	52.6883	50.0012	49.2	48.31	48.41	46.39	45.4	36.09	41.9279	28.7276	25.07	30.32	30.6054
Kaifeng	开 封 市	251.88	268.45	286.13	310.04	321.68	348.06	159.01	166.51	163	154.687	152.21	149.5	149.9	162.18	165.58	168.41	107.876	138.389	163.01	187.55	180.526
Luoyang	洛 阳 市	84.13	90.86	100.25	106.65	142.01	151	72.51	78.22	76.8	72.8832	71.71	70.18	70.29	72.85	75.96	79.84	73.6846	71.437	73.03	80.26	82.2595
Pingdingshan	平顶山市	132.39	154.47	166.83	175.74	209.39	223.26	105.25	112.33	108.1	102.587	100.94	98.88	99.2	98.38	103.98	115.46	118.224	111.305	108.39	132.22	130.696
Anyang	安 阳 市	84.79	90.76	99.63	111.08	127.54	138.31	66.42	78.81	77.4	73.4526	72.27	70.93	71.12	81.38	85.94	67.83	72.0846	56.2224	52.11	57.04	59.2298
Hebi	鹤 壁 市	65.74	69.18	64.38	65.78	64.81	66.14	30.02	35.09	34.4311	32.6751	32.15	31.5	31.6	30.44	33.19	25.81	27.0787	29.1632	28.09	34.1	33.2697
Xinxiang	新 乡 市	103.45	102.05	110.68	125.16	133.78	149.76	67.81	71.26	70	66.43	65.36	64.04	64.18	76.96	76.73	63.02	62.7686	54.6533	58.81	67.28	69.4287
Jiaozuo	焦 作 市	50.54	60.5	66.18	70	73.23	78.99	39.04	46.96	46.1	43.7489	43.05	42.38	42.48	40.95	43.71	30.49	33.156	24.4982	27.12	32.06	32.7132
Puyang	濮 阳 市	136.49	148.41	162.6	158.16	152.94	153.13	73.82	85.74	75.8412	71.9733	70.82	69.7	69.95	74.44	77.45	79.65	60.3	58.3344	60.69	66.92	68.8093
Xuchang	许 昌 市	124.99	135.73	149.77	159.12	164.25	177.67	82.75	89.44	87.74	83.2653	81.93	80.38	80.5	81.8	82.5	67.01	69.9624	53.1137	53.61	62.97	61.2612
Luohe	漯 河 市	34.4	36.5	38.22	39.21	39.15	42.66	20.89	22.16	21.7238	20.6159	20.29	19.87	19.97	21.12	22.67	23.05	17.3213	17.77	19.55	22.47	23.67
Sanmenxia	三门峡市	40.37	43.94	48.54	51.04	54.97	59.07	29	35.28	34.68	32.9113	32.38	32.54	32.74	40.15	45.01	44.03	34.2458	38.4689	36.77	41.52	43.1211
Nanyang	南 阳 市	502.47	553.71	614.63	647.12	689.51	733.39	277.68	285.04	279.2	264.961	260.71	254.49	254.95	254.54	255.52	263.51	245.497	247.592	251.02	283.79	295.303
Shangqiu	商 丘 市	549.15	592.63	621.47	661.89	714.63	749.17	314.57	328.32	321.579	305.179	300.32	294.31	294.81	268.06	260.37	240.9	242.298	252.177	259.92	291.64	302.296
Xinyang	信 阳 市	132.46	134.64	141.18	154.68	164.16	171.11	79.81	81.81	80.2	76.1098	74.89	73.2	73.4	77.49	81.81	81.98	61.7867	70.6963	71.7	79.33	83.4609
Zhoukou	周 口 市	386.52	407.5	440.3	455.7	507.95	527.63	256.67	267	261.44	248.106	244.13	238.8	239.2	262.4	276.91	285.46	255.683	270.343	290.03	296.11	311.969
Zhumadian	驻马店 市	325.73	356.79	380.1	402.54	430.84	428.46	197.95	206.23	202	191.698	188.62	184.77	185.14	186.9	186.67	178.98	147.897	151.656	156.03	187.16	190.634
Jiyuan	济 源 市	13.16	13.37	13.28	11.08	10.16	7.89	5.04	4.43	4.34	4.11866	4.05	3.97	3.98	4.21	4.29	6.01	10.2324	10.2013	10.46	12.38	13.0326
Poultry (year-end) (10 000 heads)	家禽(万只)	2001	2002	2003	2004	2005	2006	2007	2008	2009	2010	2011	2012	2013	2014	2015	2016	2017	2018	2019	2020	2021
Zhengzhou	郑 州 市	2211.56	2317.91	2461.21	2835.75	3062.59	3043.02	2703.46	3058.29	3141.64	3107.6	3241.88	3332.09	3131.81	3038.99	2854.61	2101.34	2074.83	1304.41	1041.91	1274.46	1370.11
Kaifeng	开 封 市	2177.37	2280.48	2501.42	2579.3	2780.49	3106.17	2902.24	3134.56	3222.8	3187.9	3319.31	3488	3485	3581.24	3639.56	4444.43	4597.3	3007.93	3601.64	4204.19	4045.45
Luoyang	洛 阳 市	1745.86	1838.28	2001.15	2161	2325.24	2472.27	1896.17	2218.32	2280.3	2255.5	2400.97	2540.31	2438.2	2506.99	2462.2	2481.93	2514.2	1891.88	2145.99	2587.14	3101
Pingdingshan	平顶山市	2157.16	2318.02	2415.08	2642.2	2841.26	3197.94	2829.46	3037.5	2867.29	636.865	2957.68	3123.36	3122	2699.74	2650.21	2619.69	2444.59	2029.54	1821.46	2214.21	2382.72
Anyang	安 阳 市	2854.71	3053.85	3234.47	3266.81	3515.09	3790.34	3457.24	3850	3953	945.62	4102.54	4330	4326.7	4270	3796.32	3596.64	4186.04	3294.72	3153.45	3697.78	3859.81
Hebi	鹤 壁 市	1518.66	1905.94	2365.05	2559.09	2766.38	2900.3	2650	3576.85	3687.1	3647	3720.84	3912.9	3908	4000.58	3068.68	2059.39	2338.41	1955.37	2084.55	2451.01	2507.38
Xinxiang	新 乡 市	3470.39	3416.73	3426.36	3493.69	3776.66	4034.28	3550.82	3807.1	3915.29	3873	4050.55	4254.4	4252.2	4293.23	4073.33	3060.8	4173.25	3159.16	3390.67	3904.86	3693.72
Jiaozuo	焦 作 市	2298.78	2411.81	2490.98	2583.1	2776.83	2966.76	2664.35	2624.01	2700.41	2670.6	2709.89	2866	2860.87	2311.32	1535.65	1300.68	1788.3	1034.59	1251.01	1506.48	1450.8
Puyang	濮 阳 市	2598.01	2892.35	3069.75	3261.76	3522.7	3567.04	2945.59	3054.3	3132.68	3098.8	3257.4	3480	3478.1	3628.02	3616.79	3594.15	4917.29	4830.99	6852.92	7964.26	8240.22
Xuchang	许 昌 市	2003.66	2166.64	2348.03	2519.44	2710.92	2857.03	2538.45	2626.3	2689.51	2660.4	2718.93	2821.31	2820	2643.11	2639.11	1939.45	2058.5	1615.18	1647.75	1946.88	1887.13
Luohe	漯 河 市	1508.62	1600.18	1758	1807.16	1849	1939.13	1762.59	1819.3	1865	1844.7	1950.14	2045	2044.5	2058.68	2121.6	2194.89	2414.28	2797.7	2412.54	3070.3	3825.63
Sanmenxia	三门峡市	632.82	676.19	699.48	728.62	788.37	816.43	729.19	969	993.565	982.745	1036.82	1093.37	994.44	899.82	822.65	729.84	607.702	623.749	627.47	749.37	781.803
Nanyang	南 阳 市	6457.48	7033.31	7910.78	8682.37	9342.23	9978.25	5531.62	5699.17	5822.3	5759.5	6000.06	6320	6314.5	6275.85	6435.78	6583.31	5080.18	4884.85	4960.57	5712.57	5905.29
Shangqiu	商 丘 市	3890	4040.86	4159.56	4471.73	4833.73	5221.12	4685.39	5500.2	5651.03	5589.9	5816.52	6143	6136	6071.79	6281.38	6180.51	7380.08	7547.45	7794.95	9096.82	8381.04
Xinyang	信 阳 市	3687	4173.9	4451.66	4858.59	5261.85	5578.06	5340.38	5784.34	5962.06	5897.9	6141.26	6606	6601.8	6983.07	7121.64	6843.3	5698.74	5168.6	5487.01	5990.18	6297.1
Zhoukou	周 口 市	3452.24	3621.4	3901.53	4077.1	4374.73	4676.15	4220.07	4589	4750.28	4698.9	4890.44	5205.32	5200	6610.71	7051.41	6474.13	8139.32	7715.14	8020.77	8568.65	9096.67
Zhumadian	驻马店 市	4272.29	4650.79	4873.33	5076.91	5432.3	5987.49	5360.54	5835.2	5914.33	5848.9	6081.5	6379.83	6375	6283.93	6269.36	5553.29	4392.12	4320.6	4473.28	5261.49	5107.77
Jiyuan	济 源 市	233.77	247.93	265.15	255.9	275.66	284.14	206.65	229.37	237.5	234.8	244.22	255.89	255.58	253.02	191.89	181.7	214.383	193.355	203.41	236	239.278
The data for the four indicators above are all sourced from: "Number of livestock by city" section in 《Henan Statistical Yearbook》: https://tjj.henan.gov.cn/tjfw/tjcbw/tjnj/
Agriculture, Forestry, Animal Husbandry and Fishery	农林牧渔业总产值(亿元）	2001	2002	2003	2004	2005	2006	2007	2008	2009	2010	2011	2012	2013	2014	2015	2016	2017	2018	2019	2020	2021
Zhengzhou	郑 州 市	78.7345	82.3611	49.2515	63.0833	72.3767	71.43	79.3847	94.698	103.09	124.56	131.66	142.4	263.35	269.88	276.58	285.16	263.082	241.302	234.56	263.19	278.58
Kaifeng	开 封 市	136.172	139.024	72.4802	97.1372	121.293	123.98	135.677	153.589	168.58	219.311	237.54	257.66	512.51	521.18	539.15	549.2	535.213	522.812	601.95	694.24	725.18
Luoyang	洛 阳 市	68.3011	91.5531	69.7031	88.7496	110.501	124.86	144.134	167.569	173.788	187.618	203.84	223.76	430.92	432.51	440.84	438.54	411.797	442.437	466.81	486.18	498.66
Pingdingshan	平顶山市	75.3082	77.6944	46.8423	60.5793	66.9754	69.31	80.6383	101.389	105.358	114.722	135.63	145.85	290.27	305.21	308.67	327.12	310.842	304.826	330.12	393.19	417.43
Anyang	安 阳 市	98.818	103.17	61.1248	79.9555	88.438	94.66	111.86	141.566	142.314	159.073	175.22	187.32	346.36	367.1	367.45	385.04	354.786	358.397	367.39	447.55	442.03
Hebi	鹤 壁 市	34.6592	37.9714	23.8387	31.4249	32.6757	29.62	36.385	43.9624	44.3148	48.8255	55.95	58.13	111.53	120.35	118.02	118.95	113.422	116.542	121	149.74	140.64
Xinxiang	新 乡 市	120.413	121.823	63.3555	78.9026	89.0248	91.55	110.675	131.01	131.802	157.15	187.4	200.34	367.72	387.96	387.26	387.18	378.563	384.711	428.76	501.82	501.06
Jiaozuo	焦 作 市	73.6514	75.3943	39.6242	52.5316	58.4293	58.69	68.9856	82.9903	85.5511	101.298	114.16	122.42	233.83	246.18	247.68	253.48	248.333	252.181	280.84	297.36	269.82
Puyang	濮 阳 市	85.5116	88.7201	43.3272	55.872	62.4632	61.37	72.0274	90.4529	93.7758	107.623	128.49	137.76	262.82	279.52	282.33	290.63	291.404	313.607	364.71	433.14	456.22
Xuchang	许 昌 市	114.175	121.059	67.5255	88.7656	99.5555	98.54	111.247	133.887	136.797	149.956	171.71	177.82	328.98	336.4	310.3	289.71	267.058	266.573	295.72	338.1	339.51
Luohe	漯 河 市	70.8948	74.2149	38.6584	51.0149	57.7638	52.72	59.4183	78.5914	78.6986	86.66	94.91	98.01	188.74	194.22	190.01	204.5	197.914	199.983	240.93	263.88	273.05
Sanmenxia	三门峡市	35.681	37.9319	23.7359	28.772	33.0981	36.43	42.119	54.7715	57.6111	70.0043	81.22	90.57	171.99	193.23	205.46	214.61	208.033	207.412	245.67	266.96	273.03
Nanyang	南 阳 市	290.921	312.635	195.512	253.05	275.762	275.29	302.045	344.477	366.912	401.181	415.9	423.62	770.33	818.37	875.32	903.42	905.076	922.738	1012.15	1183.65	1305.97
Shangqiu	商 丘 市	225.505	234.726	103.681	160.152	188.129	190.3	223.952	254.625	270.786	299.507	317	323.22	608.52	674.76	679.28	686.16	662.677	681.152	771.37	953.3	1062.79
Xinyang	信 阳 市	128.485	166.409	96.4646	135.547	150.417	157.06	180.808	222.286	234.832	288.038	330.05	377.64	723.85	758.82	797.38	816.29	799.327	824.515	945.51	1067.18	1183.39
Zhoukou	周 口 市	246.219	263.861	125.614	185.983	205.291	209.4	242.493	298.216	318.218	365.637	389.83	417.56	798.6	826.88	839.72	848.45	838.119	847.533	926.16	1120.63	1215.15
Zhumadian	驻马店 市	172.296	186.627	94.9491	157.076	170.186	163.08	193.662	226.387	235.701	290.666	339.95	365.91	691.25	721.81	739.17	762	744.513	765.391	867.14	1046.36	1073.91
Jiyuan	济 源 市	11.4277	12.3188	6.6927	8.8662	9.9746	9.37	11.9176	14.4387	14.5371	15.9795	18.36	19.55	36.02	36.76	36.77	39.45	32.3701	32.1883	40.98	49.89	44.79
Unit: 100 million Yuan, Source: "Gross output value of Agriculture, Forestry, Animal Husbandry and Fishery" section in 《Henan Statistical Yearbook》: https://tjj.henan.gov.cn/tjfw/tjcbw/tjnj/
Agricultural product output (10 000 Tons)	农产品产量（万吨）粮食+油料+蔬菜+瓜果	2001	2002	2003	2004	2005	2006	2007	2008	2009	2010	2011	2012	2013	2014	2015	2016	2017	2018	2019	2020	2021
Zhengzhou	郑 州 市	442.723	393.983	396.922	417.6	435.69	465.323	786.988	456.665	459.483	468.98	478.72	532.3	526.26	500.39	494.77	470.65	450.449	422.302	400.67	402.76	364.16
Kaifeng	开 封 市	837.164	693.15	612.322	675.983	746.731	838.771	462.892	850.335	887.917	922.94	947.85	1174.98	1187.7	1225.8	1258.54	1272.86	1317.53	1327.84	1422.46	1454.28	1448.19
Luoyang	洛 阳 市	329.192	303.698	363.934	393.906	421.484	463.162	479.253	446.962	463.619	469.286	477.88	516.3	507.47	509.5	569.19	545.96	528.325	557.792	553.74	564.33	555.71
Pingdingshan	平顶山市	344.469	318.438	307.457	354.335	381.607	428.879	697.328	436.27	440.16	437.822	443.25	500.96	504.01	437.58	473.62	477.37	493.832	489.527	498.66	510.32	497.95
Anyang	安 阳 市	705.857	616.442	657.81	718.066	748.906	800.869	379.668	853.05	873.888	893.32	915.31	1024.66	1033.88	1041.99	1081	1063.63	1171.86	1011.21	960.04	987.33	900.59
Hebi	鹤 壁 市	140.399	128.895	125.93	139.389	146.975	160.355	375.701	166.675	168.866	170.064	169.75	176.15	176.62	178.37	185.34	164.78	165.144	164.123	170.04	176.84	133.63
Xinxiang	新 乡 市	539.424	498.842	486.3	498.071	540.063	602.897	579.365	640.062	663.619	676.904	703.25	753.79	774.34	815.38	860.68	772.27	825.074	793.478	841.45	866.53	781.39
Jiaozuo	焦 作 市	364.754	319.406	316.18	360.329	383.544	403.034	411.986	405.479	423.295	428.629	432.37	471.9	474.15	465.68	457.68	429.41	419.399	405.829	432.66	442.2	388.77
Puyang	濮 阳 市	427.682	398.447	348.52	378.052	400.156	439.549	488.098	469.702	486.634	497.906	515.87	556.6	572.42	567.78	567.71	559.47	589.566	565.138	578.93	599.49	588.48
Xuchang	许 昌 市	492.11	425.861	420.584	463.232	495.051	525.128	472.639	492.341	490.545	494.324	501.44	543.67	543.43	537.16	526.2	471.88	463.486	471.525	466.72	475.66	455.93
Luohe	漯 河 市	403.503	342.615	282.461	360.525	401.842	436.391	250.091	364.335	361.868	368.354	372.85	419.79	423.41	433.72	446.11	405.44	399.71	412.599	429.3	445.38	443.67
Sanmenxia	三门峡市	110.054	85.4568	104.577	116.855	129.935	149.827	1128.06	158.285	160.788	165.706	167.34	188.02	188.99	184.41	202.7	190.17	197.614	203.079	204.86	212.28	214.58
Nanyang	南 阳 市	1417.21	1265.82	1270.66	1464.58	1556.34	1701.07	1425.38	1549.96	1591.68	1646.01	1680.69	1886.76	1915.21	1943.11	2013.83	1994.02	2087.57	1951.82	2137.29	2179.91	2192.49
Shangqiu	商 丘 市	1150.82	1002.35	829.739	1064.27	1263.14	1386.28	945.805	1475.96	1484.19	1515.55	1543.36	1926.91	1974.34	1960.66	1992.02	1956.38	2043.06	1928.13	2049.31	2102.43	2131.88
Xinyang	信 阳 市	456.095	591.9	510.36	671.01	752.608	872.444	1299.83	911.921	936.414	949.84	939.21	1063.12	1087.77	1117.37	1155.76	1155.64	1140.3	1122.93	1172.96	1172.85	1149.76
Zhoukou	周 口 市	1251.62	1173.25	845.085	1178.94	1226.97	1395.42	1109.69	1492.72	1542.03	1595.07	1639.01	2092.78	2173.25	2221.45	2301.74	2293.37	2476.24	2391.06	2435.45	2465.14	2403.03
Zhumadian	驻马店 市	685.244	810.323	496.248	858.203	898.941	1022.69	635.02	1060.43	1114.61	1143.59	1170.18	1377.93	1387.24	1398.15	1454.7	1452.27	1491.18	1376.57	1550.71	1567.1	1571.18
Jiyuan	济 源 市	42.6831	40.4792	39.458	43.1671	45.934	51.0396	50.7465	50.7465	50.9761	52.3151	53.55	56.74	58.16	50.64	52.75	51.2	48.3405	44.568	45.08	47.51	46.71
Source: "Output of major farm products" section in 《Henan Statistical Yearbook》: https://tjj.henan.gov.cn/tjfw/tjcbw/tjnj/
Agricultural labor population (10 000 persons)	农业劳动力人口（万人）(第一产业）（分三次产业就业人口）	2001	2002	2003	2004	2005	2006	2007	2008	2009	2010	2011	2012	2013	2014	2015	2016	2017	2018	2019	2020	2021
Zhengzhou	郑 州 市	144.86	121.48	134.535	131.66	128.83	120.48	107.91	87.3	112.59	101.04	100.27	99.71	96.29	105.64	95.29	94.41	91.5212	91.4506	91.07	66.27	63.77
Kaifeng	开 封 市	187.71	184.09	185.966	179.88	179.49	178.28	178.2	165	158	158.321	148.72	142.11	137.68	135.64	136.06	116.8	118.082	131.417	130.51	78.59	75.52
Luoyang	洛 阳 市	217.9	198.59	206.42	197.06	182.12	178.4	169.04	146.5	154.92	153.335	151.94	153.01	149.51	157.59	160.84	152.61	155.095	153.921	117.39	66.89	64.57
Pingdingshan	平顶山市	185.7	188.48	178.887	173.99	166.65	162.14	155.37	157.87	160.209	147.693	144.2	144.26	142.16	146.7	151.21	156.99	155.428	153.499	127.41	62.4	59.97
Anyang	安 阳 市	195.25	194.38	188.787	186.37	175.49	162.58	154.87	153.363	151.19	151.333	146.38	138.44	139.65	155.81	127.91	129.3	129.229	113.961	113.88	58.52	55.26
Hebi	鹤 壁 市	48.66	47.25	45.319	38.9	36.43	35.42	32.77	31.79	31.23	31.0269	31.03	30.08	27.47	27.94	28.18	28.88	27.7412	31.2279	27.35	14.04	13.63
Xinxiang	新 乡 市	165.14	158.64	161.932	161.09	154.87	149.79	139.92	134.707	166.143	126.113	125	123.63	110.13	111.02	114.85	122.41	124.877	117.978	111.04	67.17	63.4
Jiaozuo	焦 作 市	98.28	94	94.43	91.56	89.24	85.85	83.65	83.13	81.43	80.9355	79.91	78.17	76.04	75.94	76.18	75.7	75.674	69.95	67.53	23.96	22.95
Puyang	濮 阳 市	139.63	141.72	135.09	129.32	126.89	114.85	116.79	146.196	150.35	115.556	87.19	109.96	117.24	114.06	105.97	103.28	106.975	98.4626	84.53	43.96	41.8
Xuchang	许 昌 市	162.44	163.37	159.135	149.02	138.84	133.56	121.47	114.38	106.45	105.948	99.3	104.16	98.99	121.19	115.99	120.53	120.147	107.002	99.46	56.47	54.65
Luohe	漯 河 市	85.88	80.98	80.398	79.82	78.71	77.86	75.62	71.16	70.7353	69.7982	69.55	69.64	69.68	76.96	77.64	77.25	79.0128	72.9906	68.39	33.25	32.28
Sanmenxia	三门峡市	71.16	68.71	68.17	67.56	66.89	66.23	65.35	64.87	76.13	61.8875	63.07	62.23	62.88	61.58	62.5	63.32	62.8753	61.9895	53.98	34.74	34.15
Nanyang	南 阳 市	400.23	406.34	377.35	377.32	357.74	353.86	343.12	341.07	334.961	330.414	337.48	333.12	319.98	326.99	332.99	332.25	333.744	321.691	295.53	158.17	152.5
Shangqiu	商 丘 市	328.25	307.72	307.69	300.97	291.48	291.913	275.73	280.25	275.113	235.98	229.06	224.49	223.29	227.03	229.51	221.03	222.632	202.749	190.84	106.61	101.85
Xinyang	信 阳 市	252.22	240.19	247.02	243.47	236.53	237.15	226.79	232.18	239.793	216.036	213.08	213.64	208.75	219.12	221.13	222.46	227.839	223.786	211.3	105.46	101.9
Zhoukou	周 口 市	415.87	551.22	399.84	388.89	383.18	357.82	360.23	356.19	360.15	331.437	330.14	319.71	311.63	306.72	306.39	305.59	310.968	305.27	254.53	137.84	130.3
Zhumadian	驻马店 市	363.94	348.82	342.38	331.23	330.69	308.2	304.78	285.3	272.76	285.937	275.61	274.8	261.48	245.69	235.21	235.16	235.756	232.49	219.09	103.74	98.77
Jiyuan	济 源 市	19.16	17.73	18.45	17.55	15.17	14.37	13.17	12.5	13.03	13.1427	15.69	13.99	13.78	13.94	14.63	14.86	14.8381	13.78	13.6	4.92	4.73
Source: "Number of employed persons by three strata of industry and city" section in 《Henan Statistical Yearbook》: https://tjj.henan.gov.cn/tjfw/tjcbw/tjnj/
